# Supplementary material for: Volumetric evaluation of 99mTc-pyrophosphate SPECT/CT for transthyretin cardiac amyloidosis: Methodology and correlation with cardiac functional parameters
Source: PubMed Central journal article supplement (PMC9834362; doi:10.1007/s12350-021-02857-7), 2021-12-14
Supplement: 12350_2021_2857_MOESM1_ESM.pdf [file 12350_2021_2857_MOESM1_ESM.pdf]

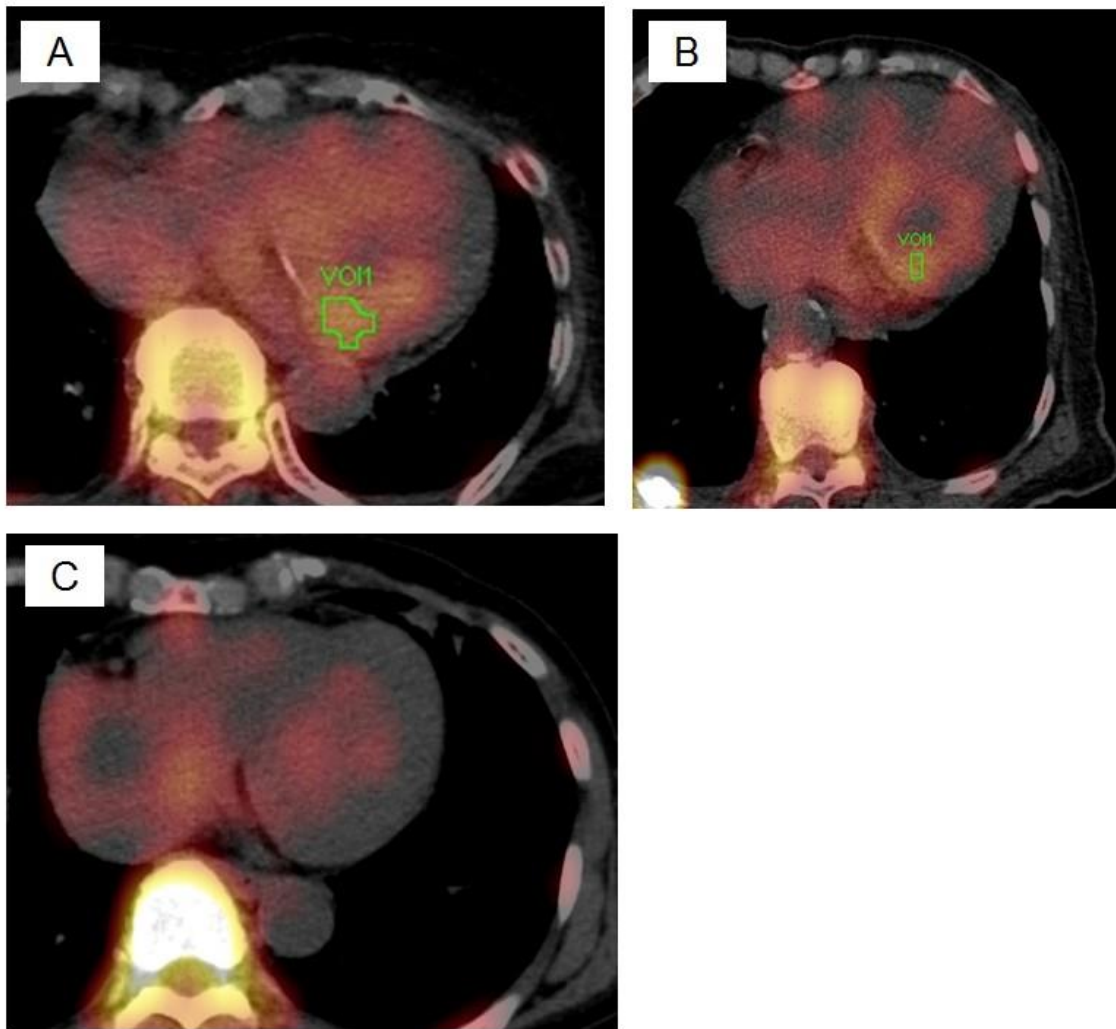

**Supplemental Figure S1.** SPECT/CT images of three EMB-proven ATTR-CA patients whose CPV were low. Their CPV<sub>1.2</sub> were 3.9, 2.6, and 0.0 cm<sup>3</sup>, and their CPV<sub>1.4</sub> were 0.0 cm<sup>3</sup>. The myocardial regions where <sup>99m</sup>Tc-pyrophosphate uptakes were  $> 1.2 \times$  aortic blood pool SUV<sub>max</sub> are shown by green contours in two patients (A and B). *ATTR-CA* transthyretin cardiac amyloidosis, *CPV* cardiac pyrophosphate volume, *EMB* endomyocardial biopsy, *SPECT* single-photon emission computed tomography, *SUV* standardized uptake value.
